# Supplementary material for: Synthesis, Antibacterial, Antioxidant, and Molecular Modeling Studies of Novel [2,3′-Biquinoline]-4-Carboxylic Acid and Quinoline-3-Carbaldehyde Analogs
Source: Hindawi journal article supplement (doi:10.1155/2021/9939506), 2021-04-30

## Supplementary Materials

|                                                                                                             |    |
|-------------------------------------------------------------------------------------------------------------|----|
| Figure 1. $^1\text{H}$ NMR of 2'-chloro-[2,3'-biquinoline]-4-carboxylic acid (4) .....                      | 2  |
| Figure 2. $^{13}\text{C}$ NMR of 2'-chloro-[2,3'-biquinoline]-4-carboxylic acid (4) .....                   | 3  |
| Figure 3. The $^1\text{H}$ NMR of 2'-chloro-8,8'-dimethyl-[2,3'-biquinoline]-4-carboxylic acid (7) .....    | 4  |
| Figure 4. The $^{13}\text{C}$ NMR of 2'-chloro-8,8'-dimethyl-[2,3'-biquinoline]-4-carboxylic acid (7) ..... | 5  |
| Figure 5. $^1\text{H}$ NMR of 2'-methoxy-8'-methyl-[2,3'-biquinoline]-4-carboxylic acid (9) .....           | 6  |
| Figure 6. $^{13}\text{C}$ NMR of 2'-methoxy-8'-methyl-[2,3'-biquinoline]-4-carboxylic acid (9) .....        | 7  |
| Figure 7. $^1\text{H}$ NMR of 2'-methoxy-8,8'-dimethyl-[2,3'-biquinoline]-4-carboxylic acid (10) .....      | 8  |
| Figure 8. $^{13}\text{C}$ NMR of 2'-methoxy-8,8'-dimethyl-[2,3'-biquinoline]-4-carboxylic acid (10) .....   | 9  |
| Figure 9. The $^1\text{H}$ NMR of 2-phenylquinoline-4-carboxylic acid (12) .....                            | 10 |
| Figure 10. The $^{13}\text{C}$ NMR of 2-phenylquinoline-4-carboxylic acid (12) .....                        | 11 |
| Figure 11. The $^1\text{H}$ NMR spectroscopic of 2-(o-tolylimino)propanoic acid (15) .....                  | 12 |
| Figure 12. The NMR spectroscopic of 2-(o-tolylimino)propanoic acid (15) .....                               | 14 |
| Figure 13. $^1\text{H}$ NMR of 2-((2-hydroxyethyl)amino)quinoline-3-carbaldehyde (17) .....                 | 15 |
| Figure 14. $^{13}\text{C}$ NMR of 2-((2-hydroxyethyl)amino)quinoline-3-carbaldehyde (17) .....              | 16 |
| Figure 15. $^1\text{H}$ NMR of 3-chloro-3-(2-chloro-6-iodoquinolin-3-yl)acrylaldehyde (20) .....            | 17 |
| Figure 16. $^{13}\text{C}$ NMR of 3-chloro-3-(2-chloro-6-iodoquinolin-3-yl)acrylaldehyde (20) .....         | 19 |
| Figure 17. $^1\text{H}$ NMR of N-(((4-iodophenyl)amino)methylene)-N-methylmethanaminium (21) ...            | 20 |
| Figure 18. $^{13}\text{C}$ NMR of N-(((4-iodophenyl)amino)methylene)-N-methylmethanaminium (21) ..          | 21 |

**Figure 1.**  $^1\text{H}$  NMR of 2'-chloro-[2,3'-biquinoline]-4-carboxylic acid (**4**)

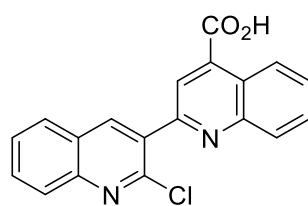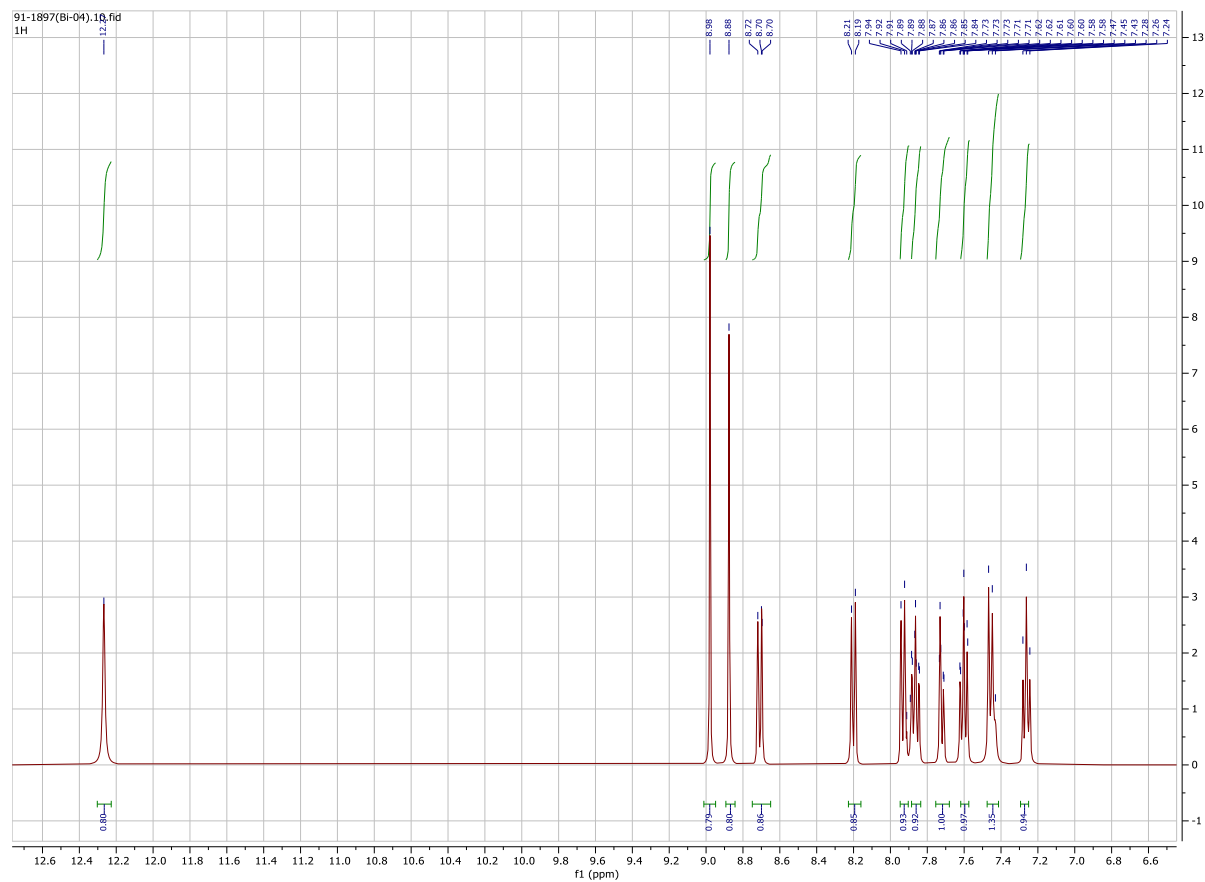

**Figure 2.**  $^{13}\text{C}$  NMR of 2'-chloro-[2,3'-biquinoline]-4-carboxylic acid (**4**)

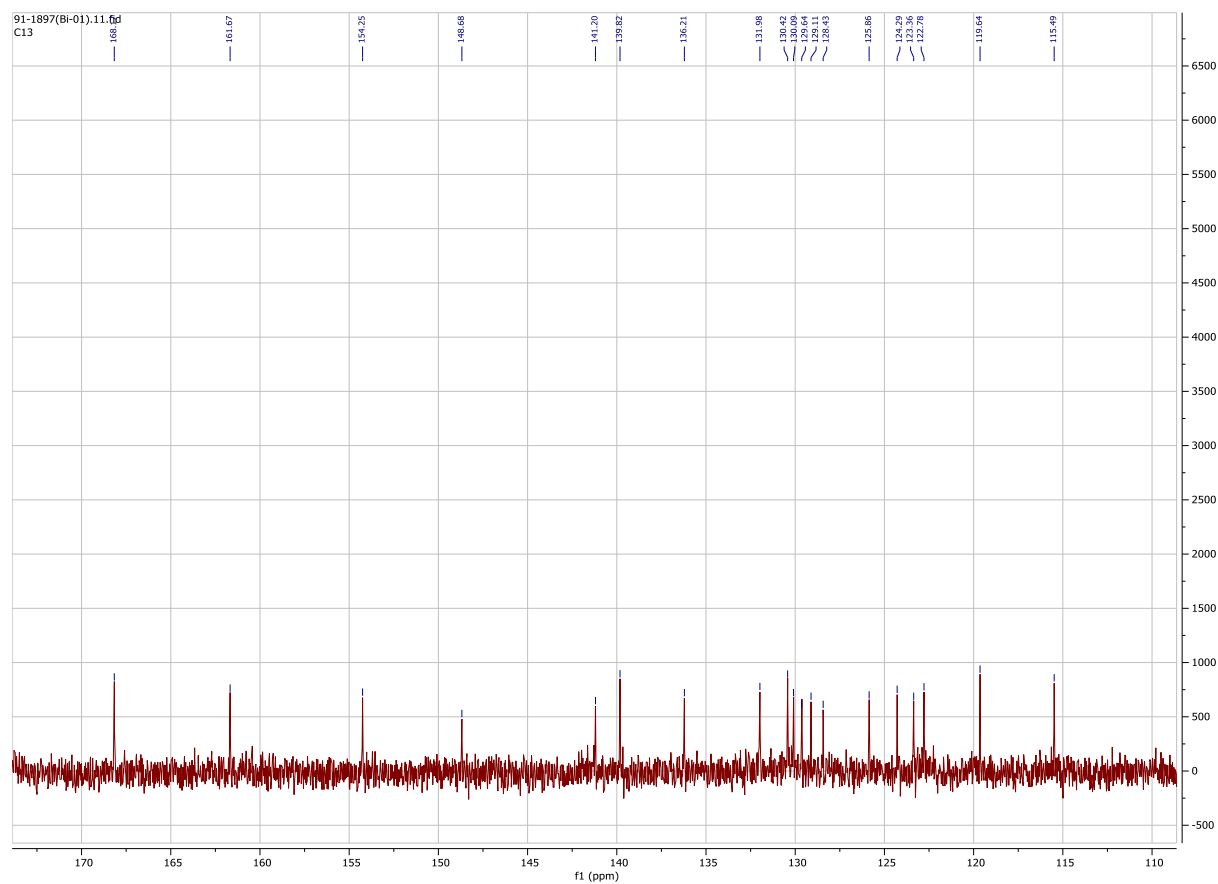

**Figure 3.** The  $^1\text{H}$  NMR of 2'-chloro-8,8'-dimethyl-[2,3'-biquinoline]-4-carboxylic acid (**7**)

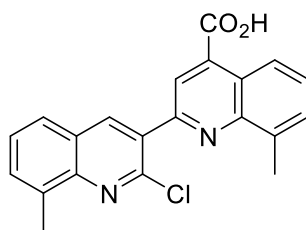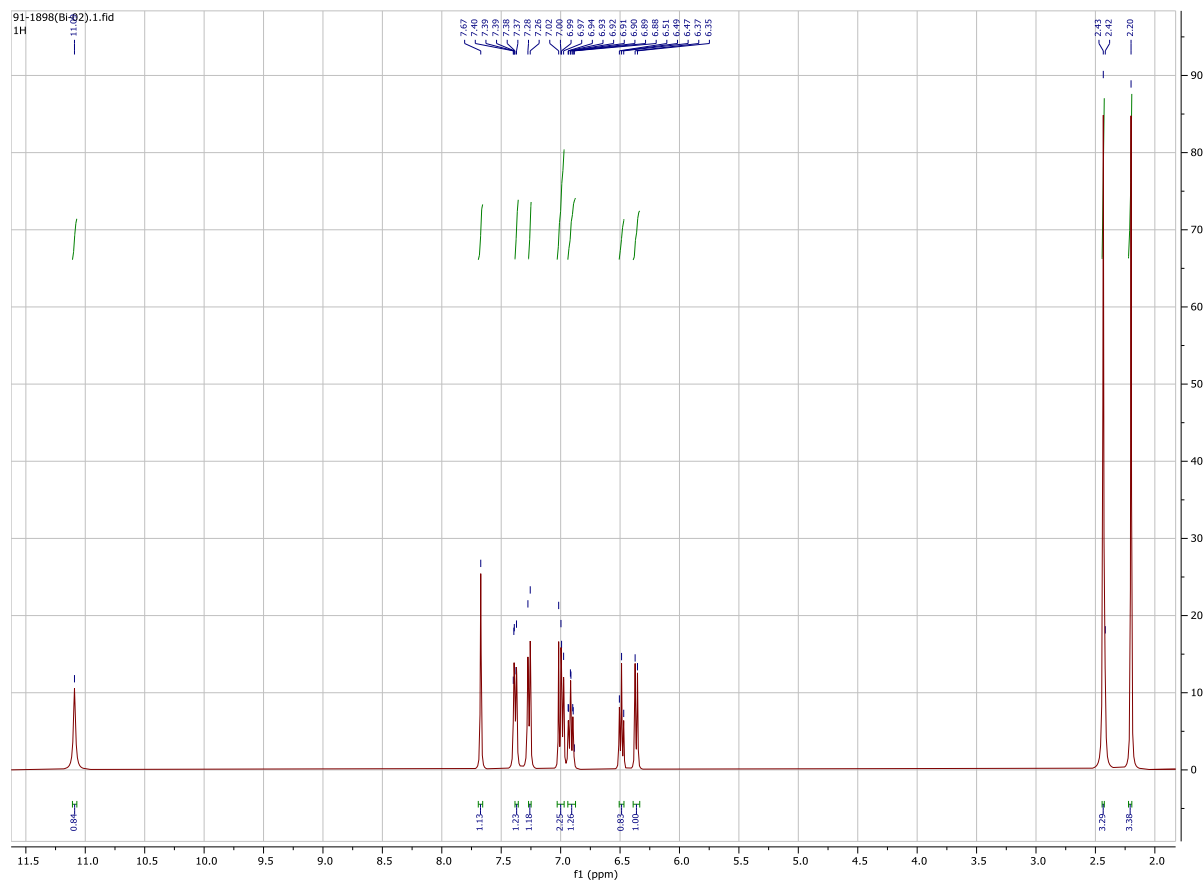

**Figure 4.** The  $^{13}\text{C}$  NMR of 2'-chloro-8,8'-dimethyl-[2,3'-biquinoline]-4-carboxylic acid (7)

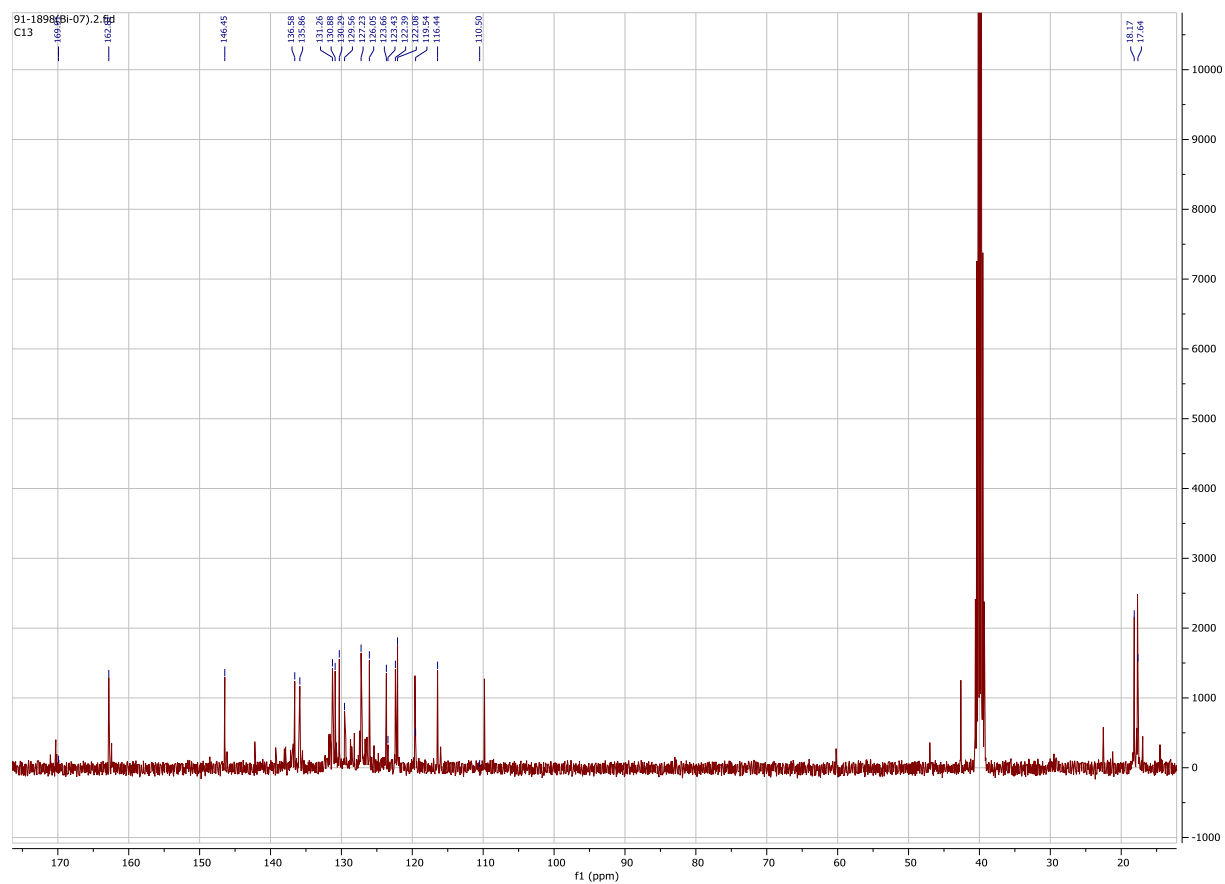

**Figure 5.**  $^1\text{H}$  NMR of 2'-methoxy-8'-methyl-[2,3'-biquinoline]-4-carboxylic acid (9)

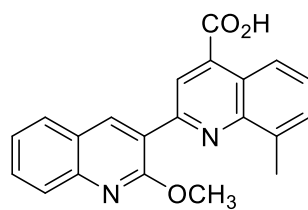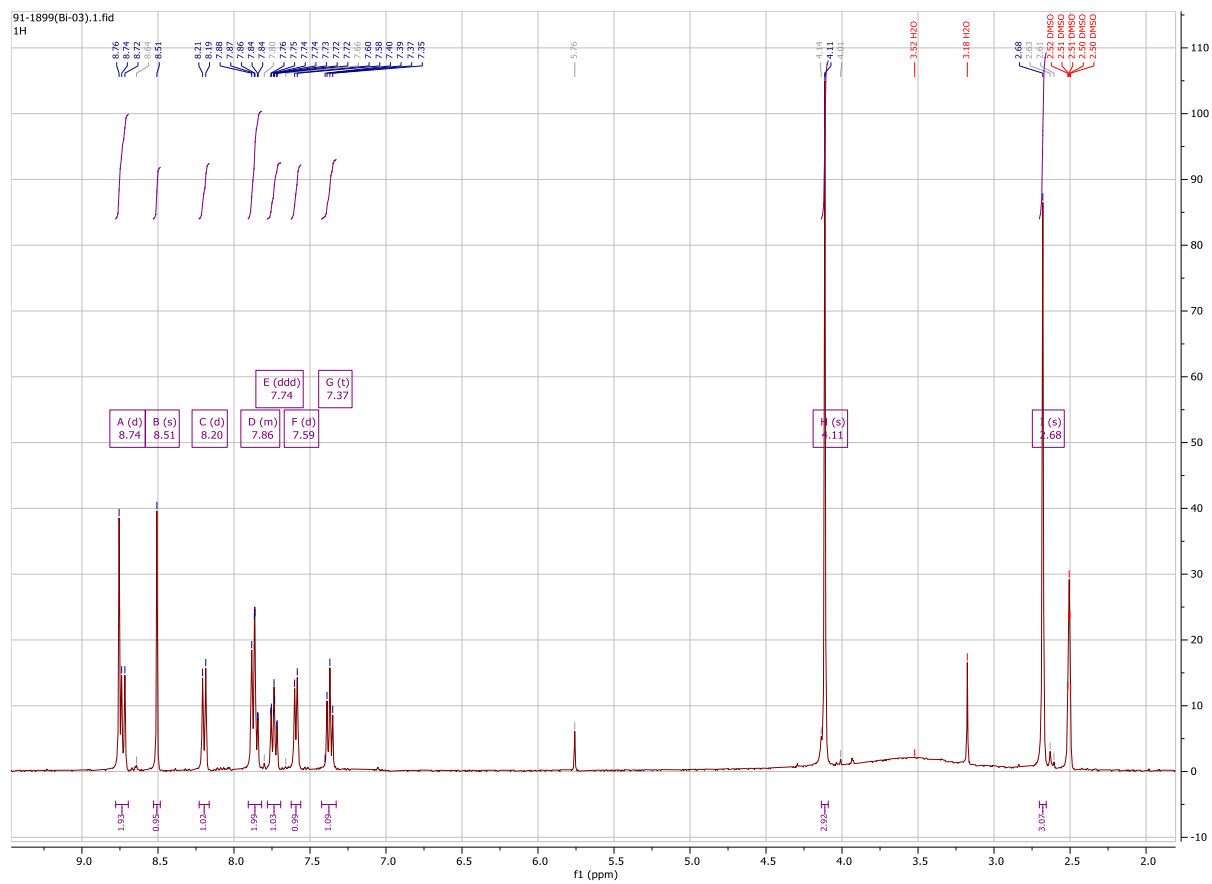

**Figure 6.**  $^{13}\text{C}$  NMR of 2'-methoxy-8'-methyl-[2,3'-biquinoline]-4-carboxylic acid (**9**)

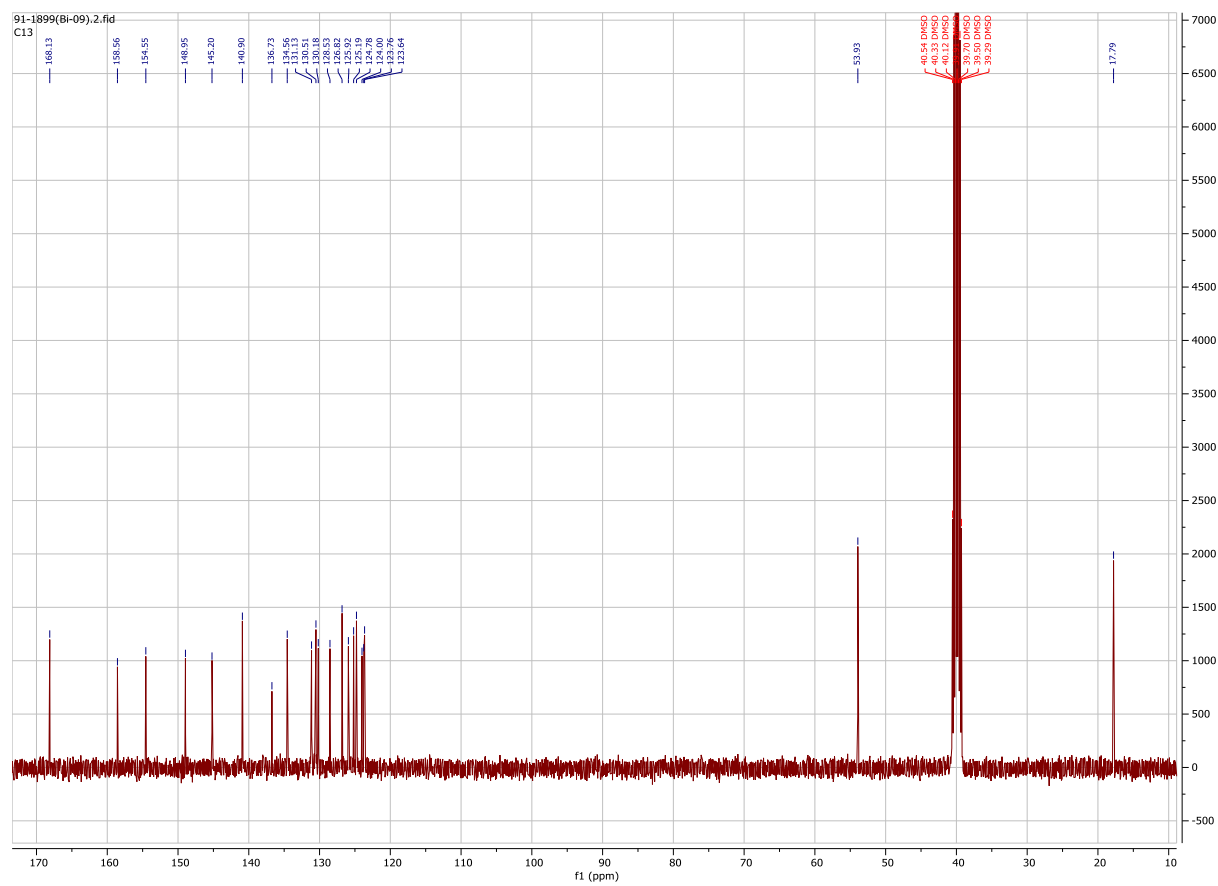

**Figure 7.**  $^1\text{H}$  NMR of 2'-methoxy-8,8'-dimethyl-[2,3'-biquinoline]-4-carboxylic acid (**10**)

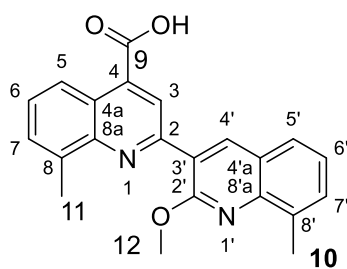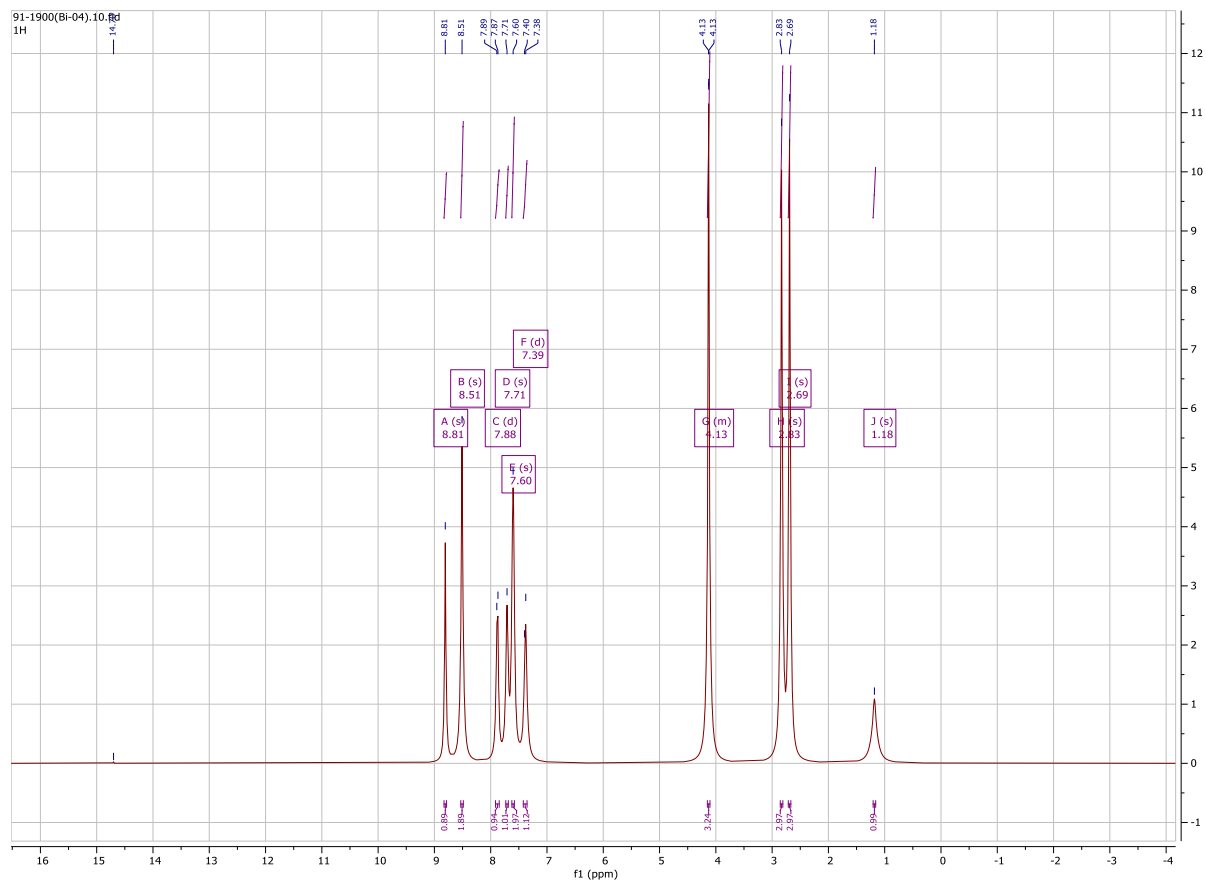



**Figure 8.**  $^{13}\text{C}$  NMR of 2'-methoxy-8,8'-dimethyl-[2,3'-biquinoline]-4-carboxylic acid (**10**)

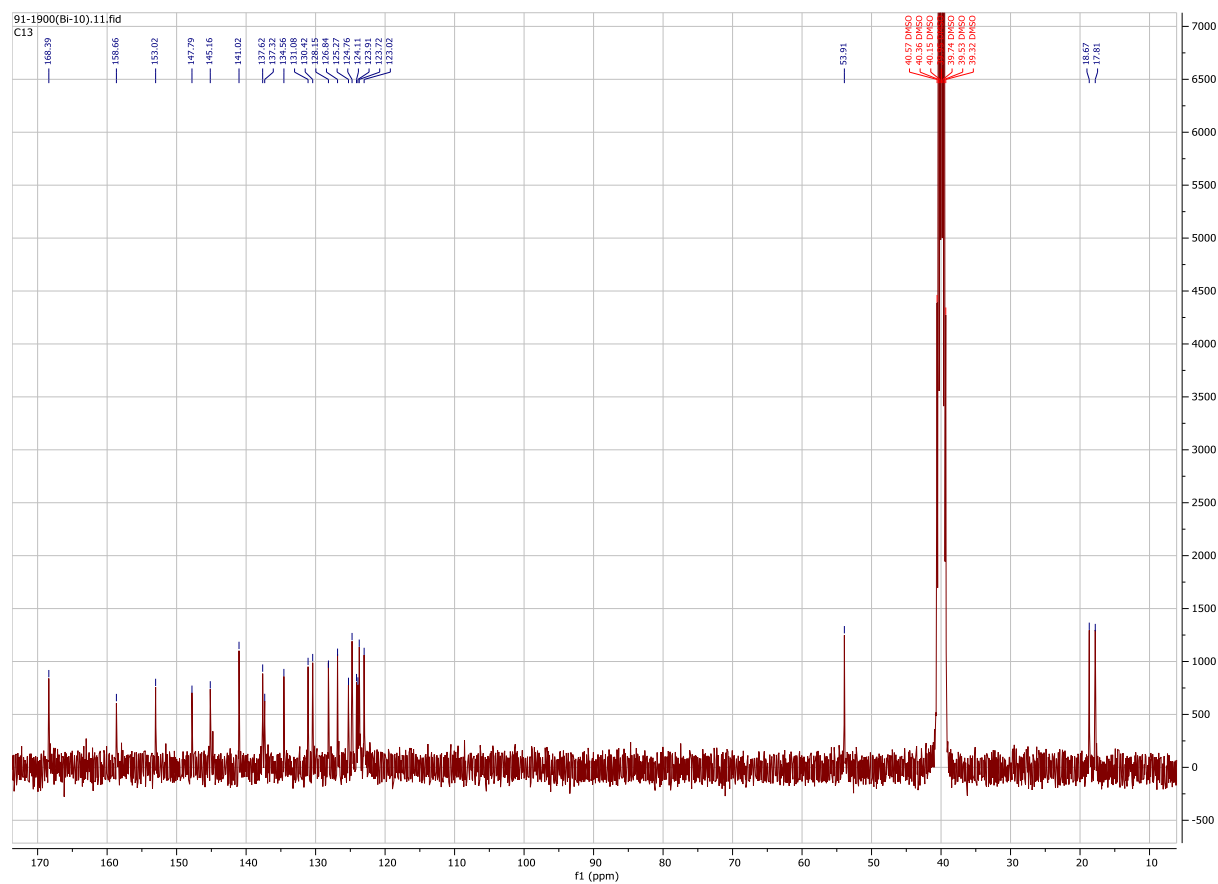

**Figure 9.** The  $^1\text{H}$  NMR of 2-phenylquinoline-4-carboxylic acid (**12**)

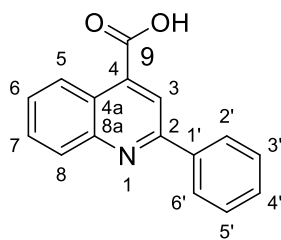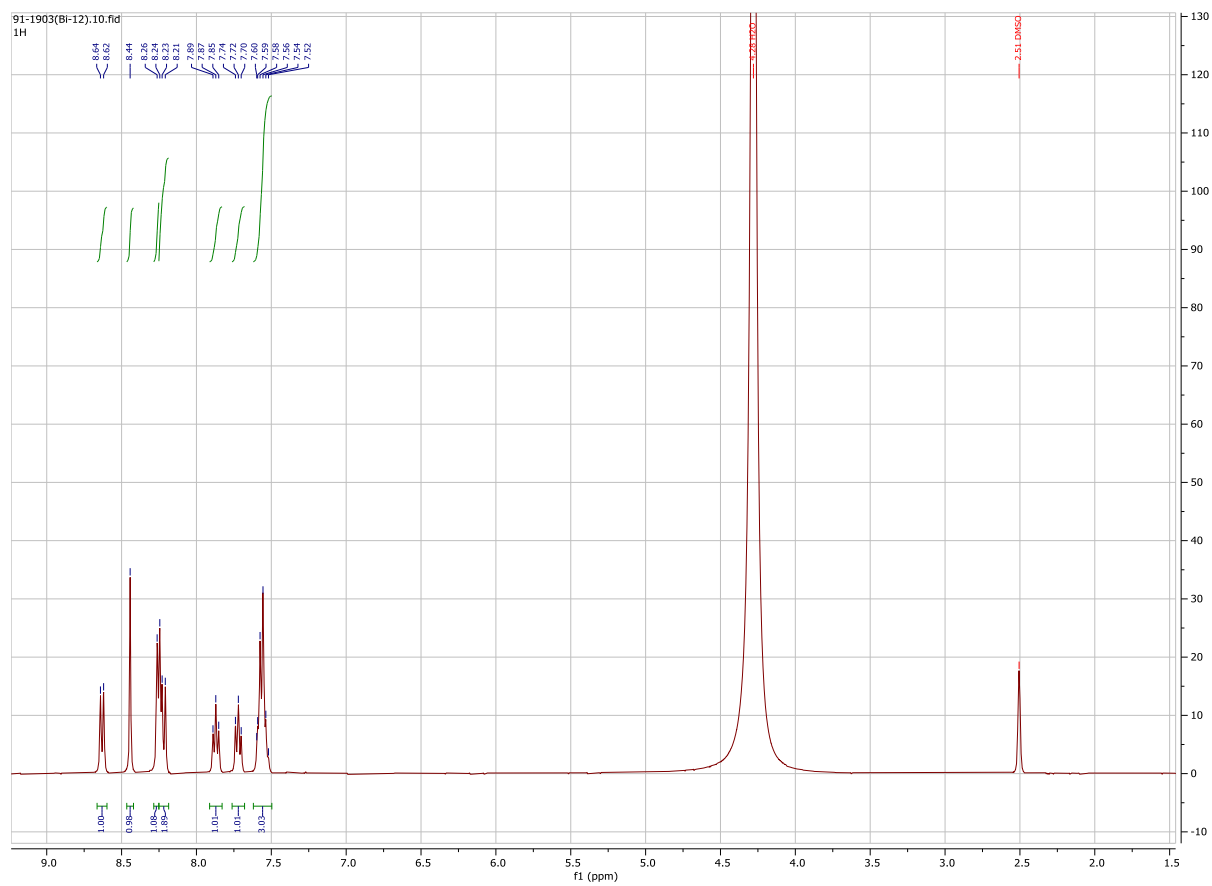

**Figure 10.** The  $^{13}\text{C}$  NMR of 2-phenylquinoline-4-carboxylic acid (**12**)

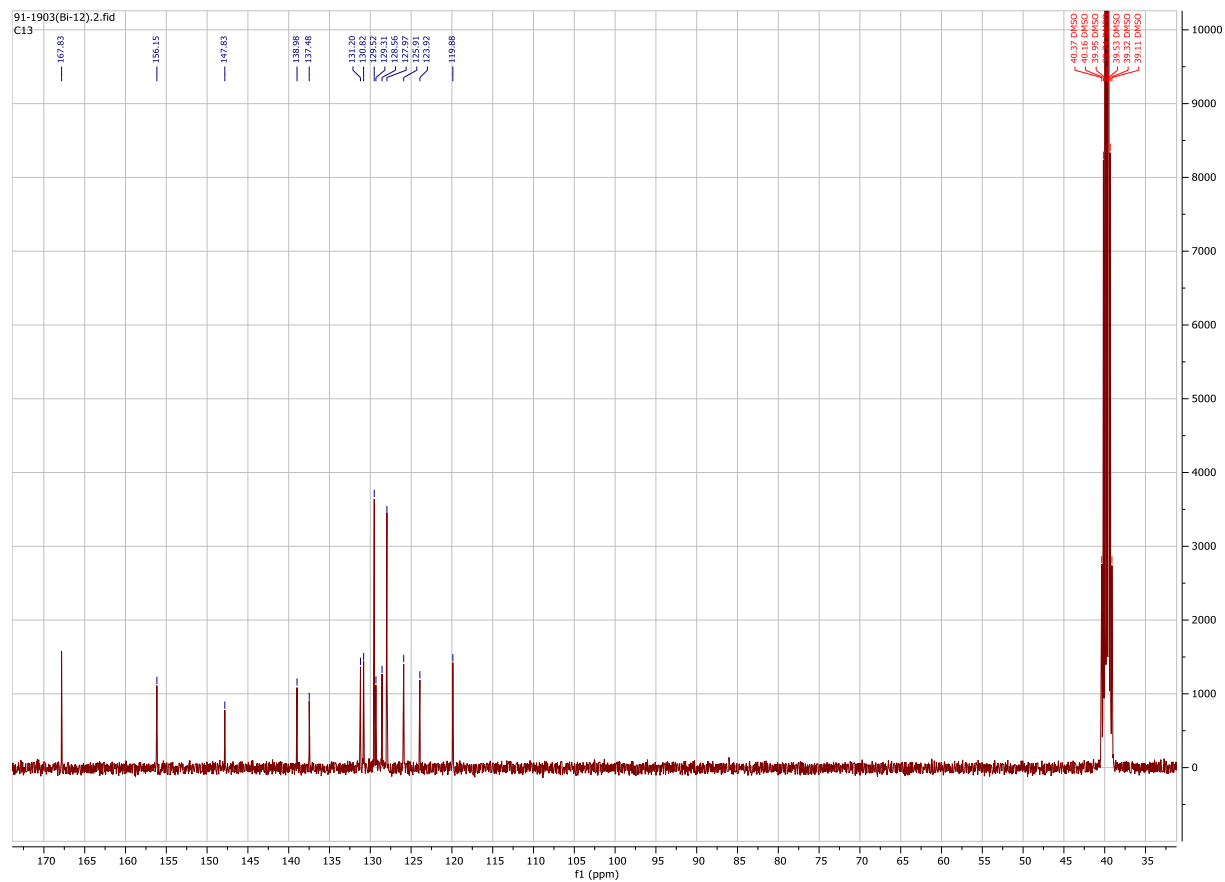

**Figure 11.** The  $^1\text{H}$  NMR spectroscopic of 2-(o-tolylimino)propanoic acid (**15**)

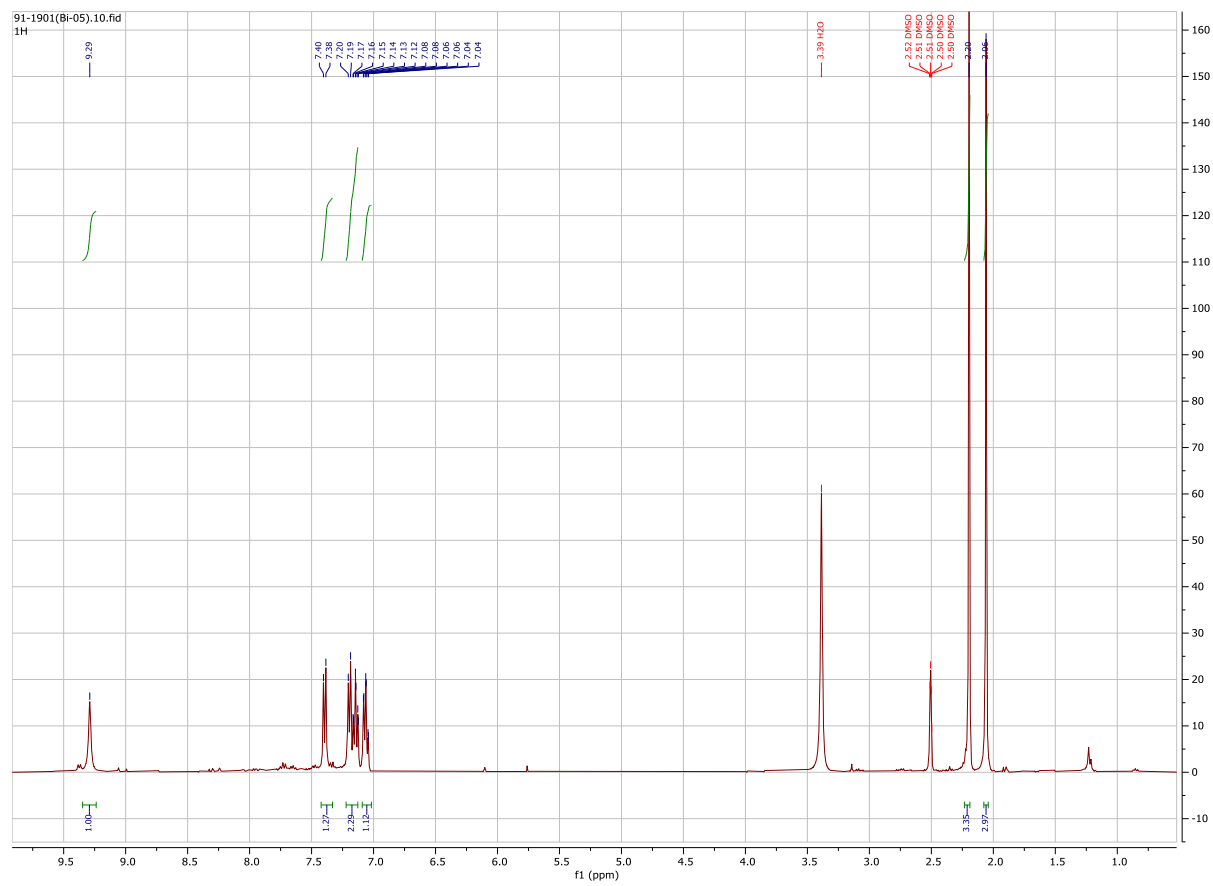

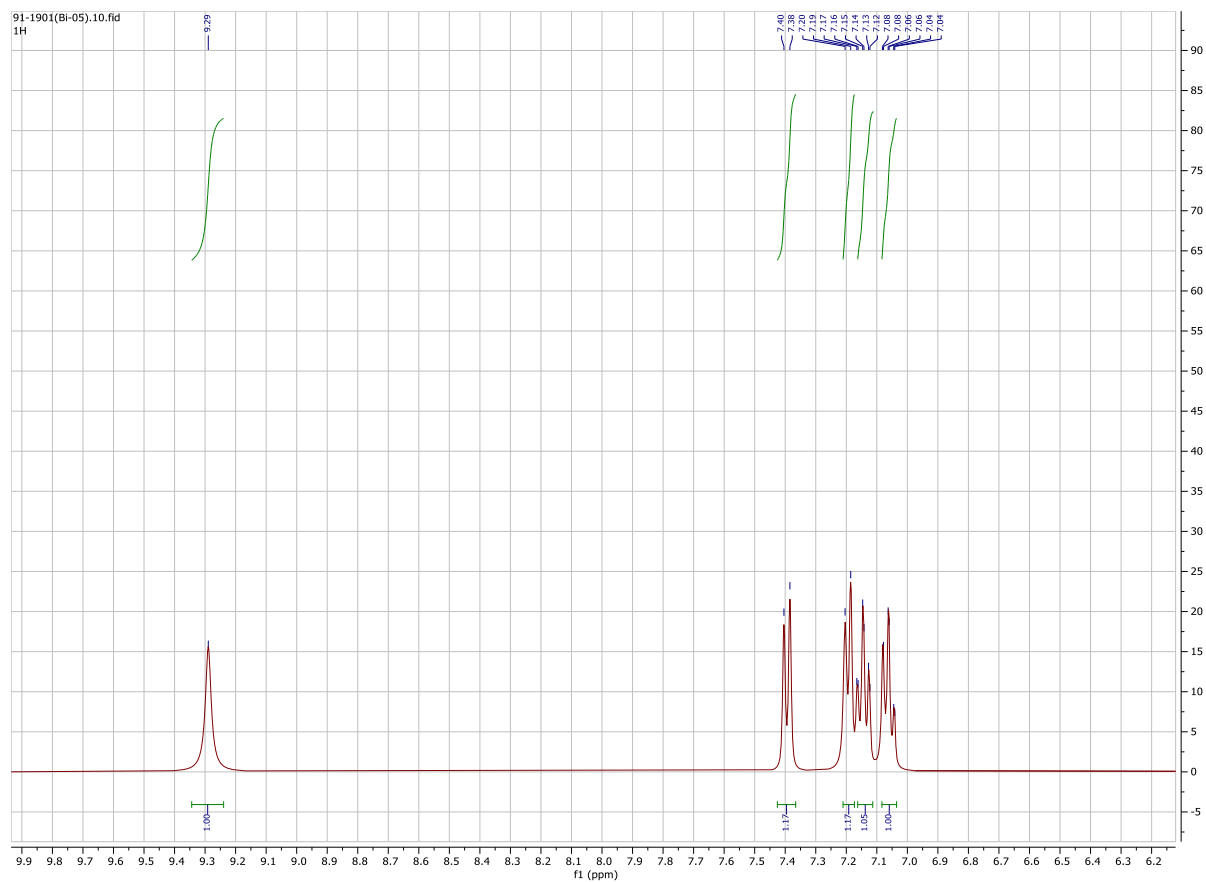

**Figure 12.** The NMR spectroscopic of 2-(o-tolylimino)propanoic acid (**15**)

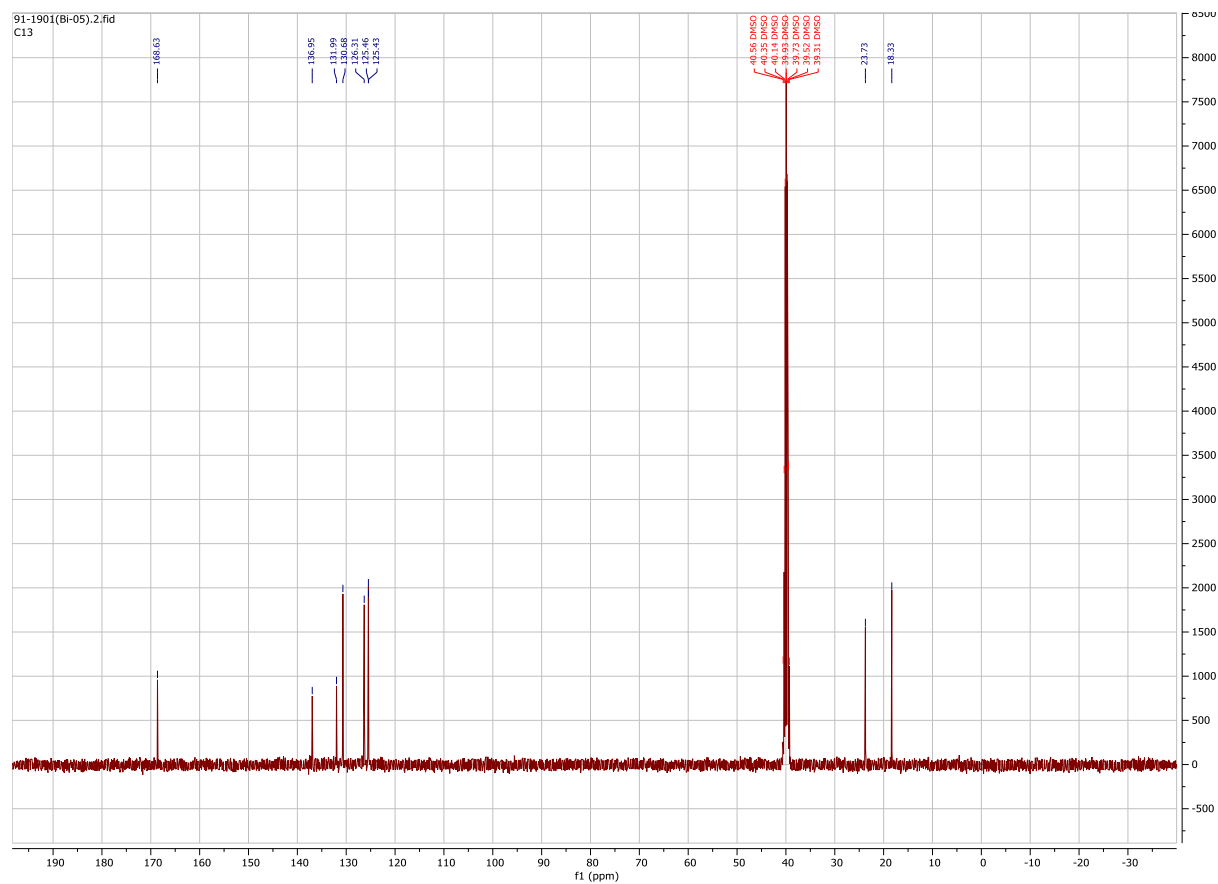

**Figure 13.**  $^1\text{H}$  NMR of 2-((2-hydroxyethyl)amino)quinoline-3-carbaldehyde (**17**)

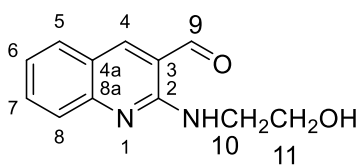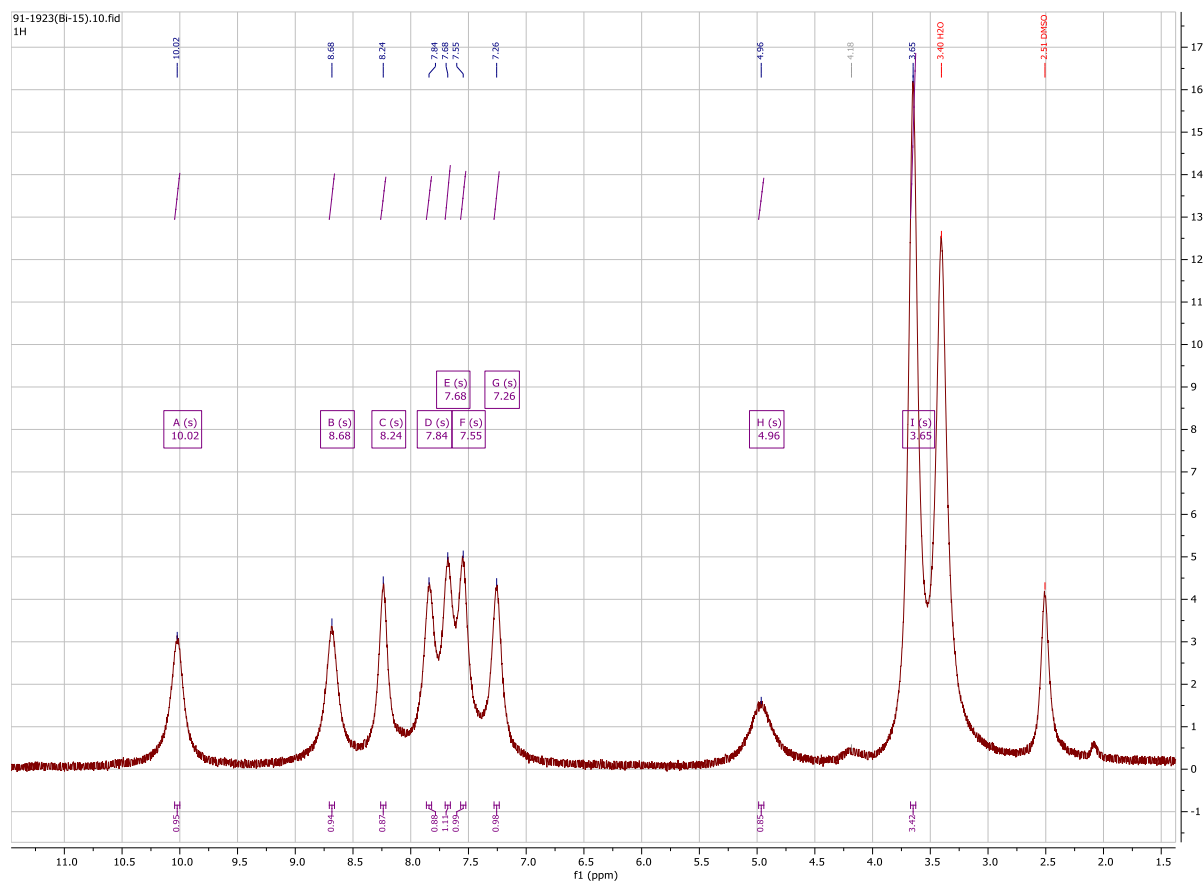

**Figure 14.**  $^{13}\text{C}$  NMR of 2-((2-hydroxyethyl)amino)quinoline-3-carbaldehyde (**17**)

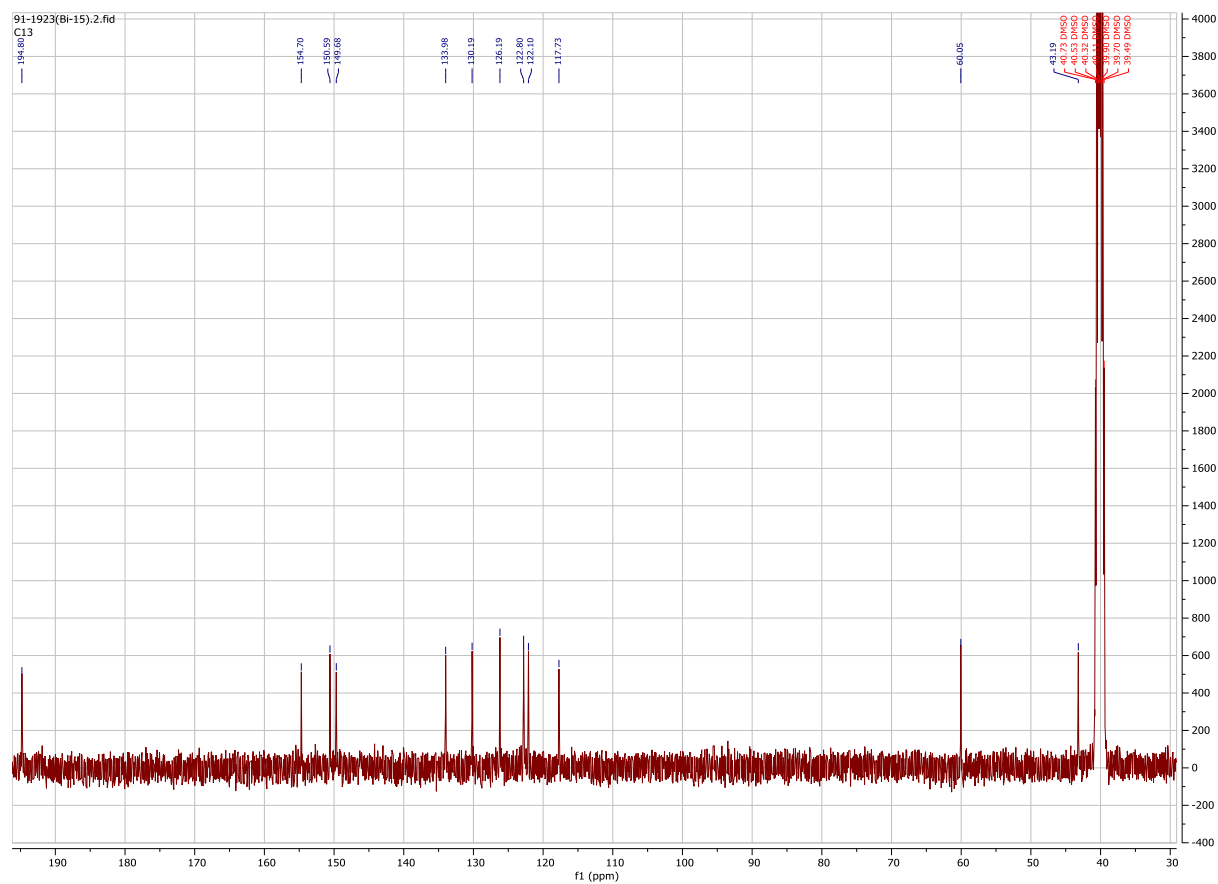



**Figure 15.**  $^1\text{H}$  NMR of 3-chloro-3-(2-chloro-6-iodoquinolin-3-yl)acrylaldehyde (**20**)

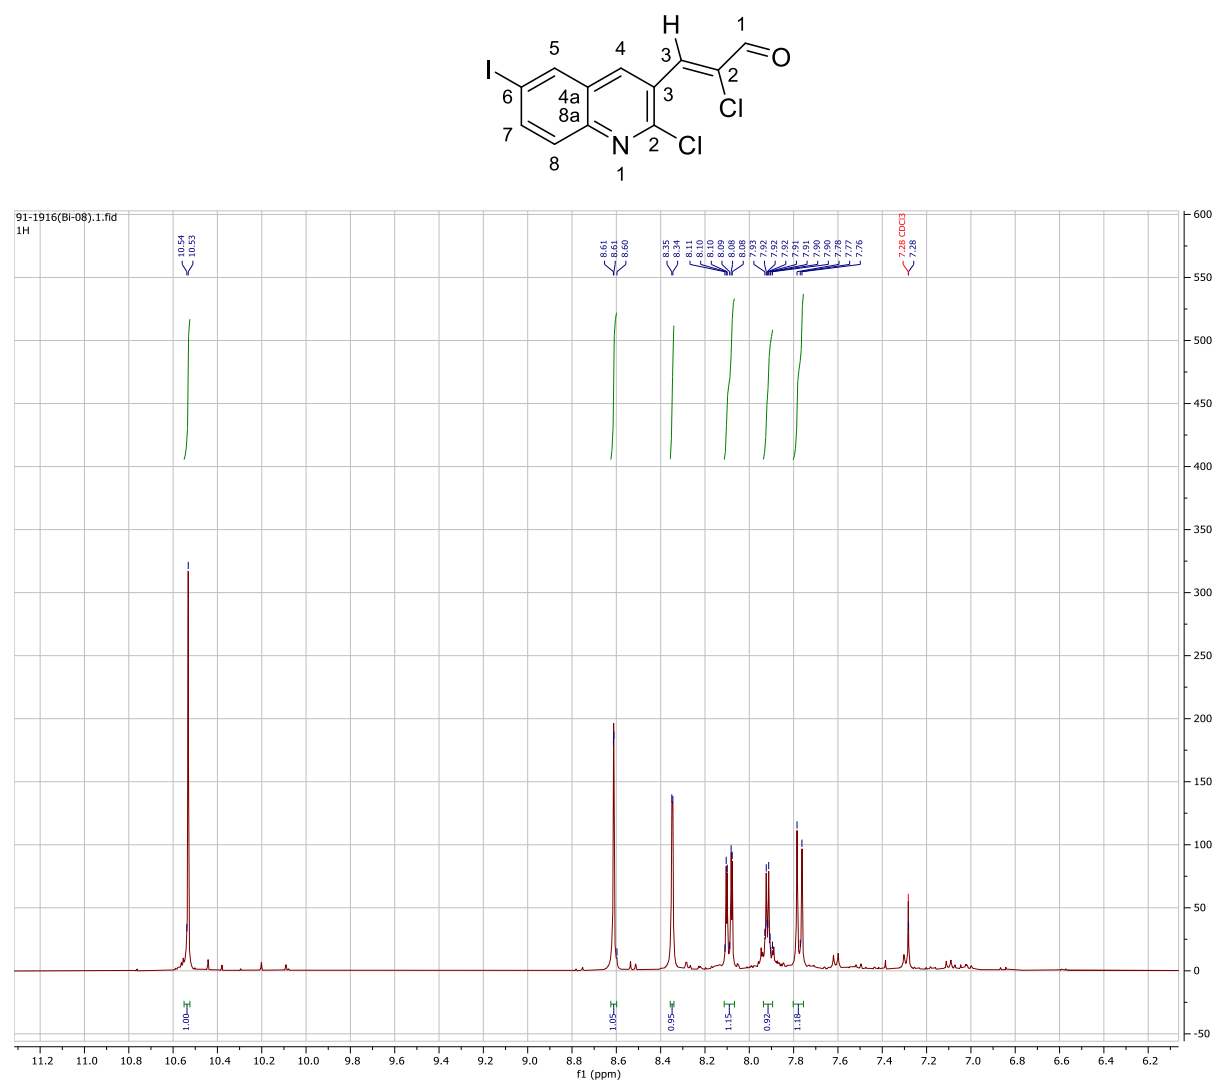

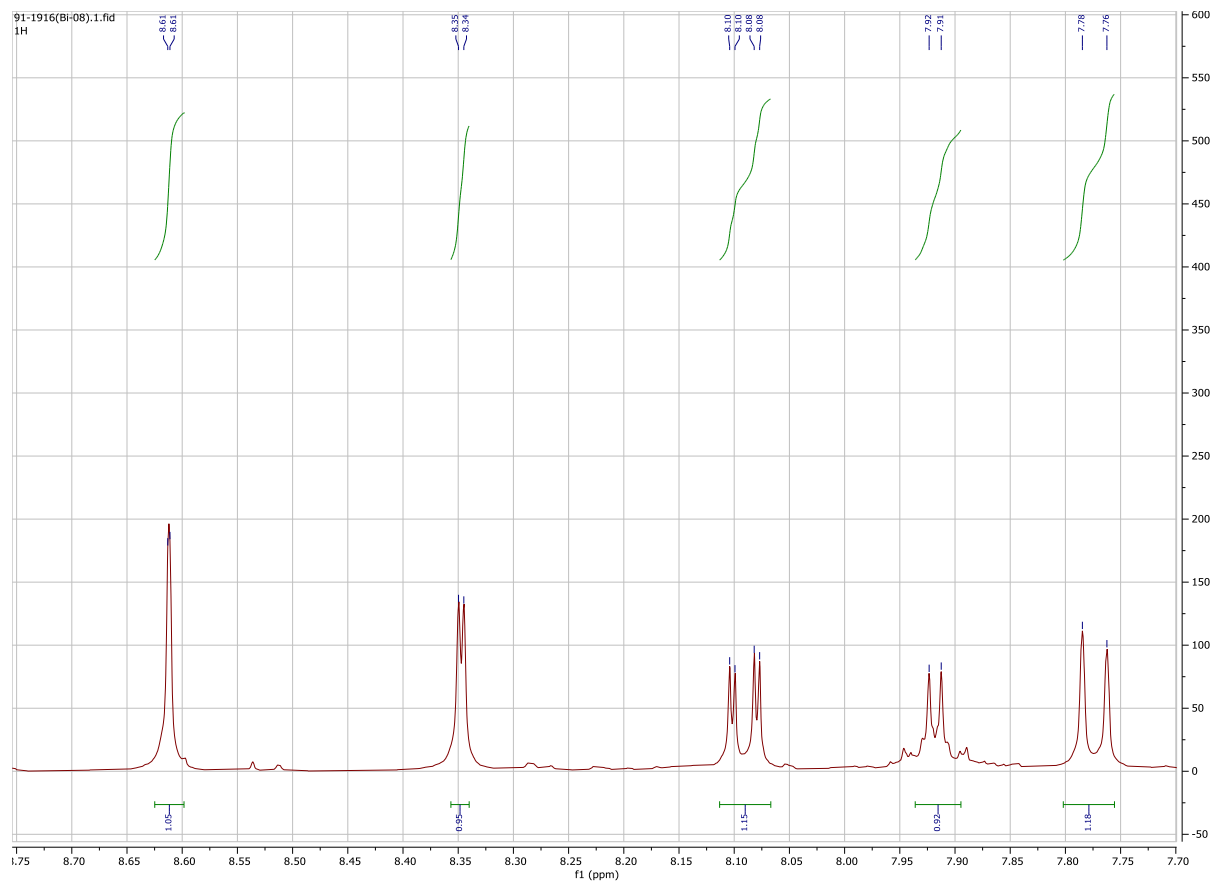

**Figure 16.**  $^{13}\text{C}$  NMR of 3-chloro-3-(2-chloro-6-iodoquinolin-3-yl)acrylaldehyde (**20**)

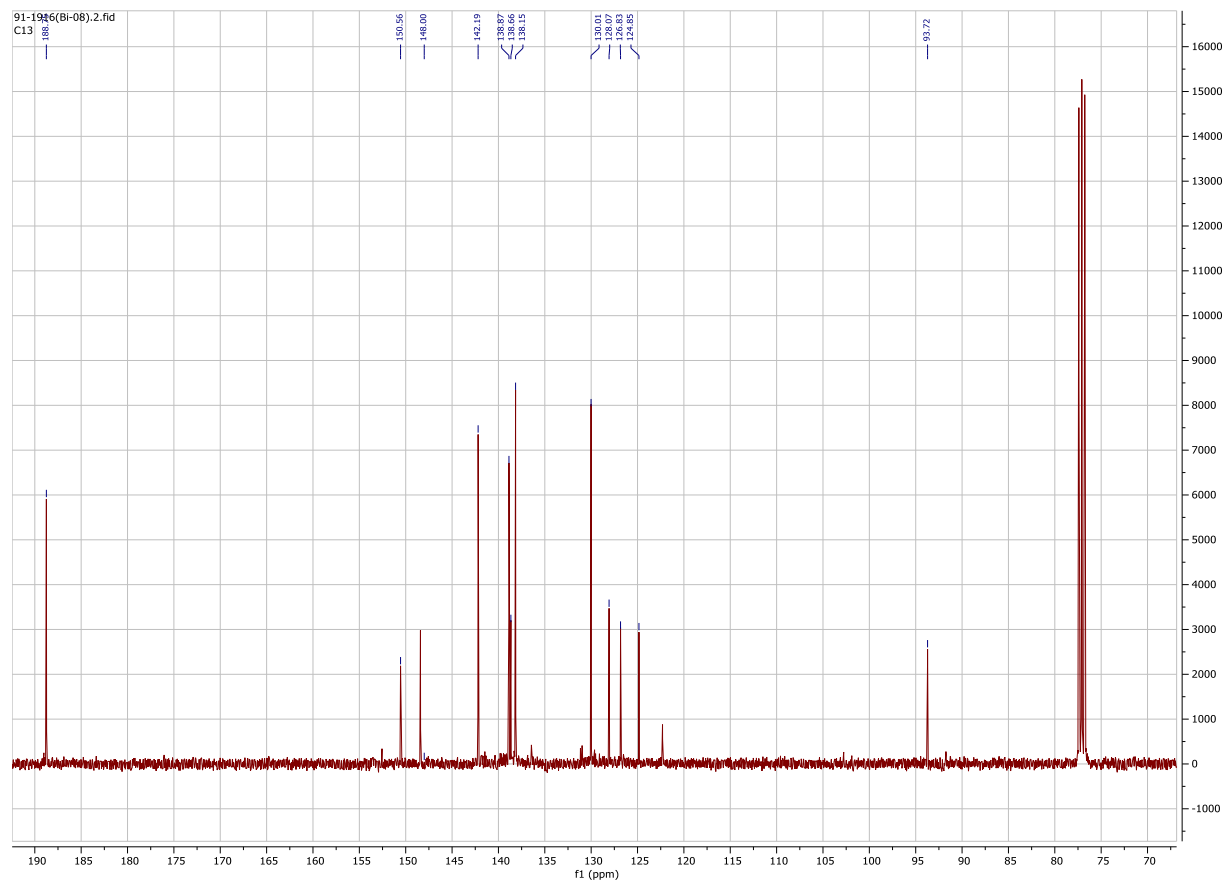

**Figure 17.**  $^1\text{H}$  NMR of N-(((4-iodophenyl)amino)methylene)-N-methylmethanaminium (**21**)

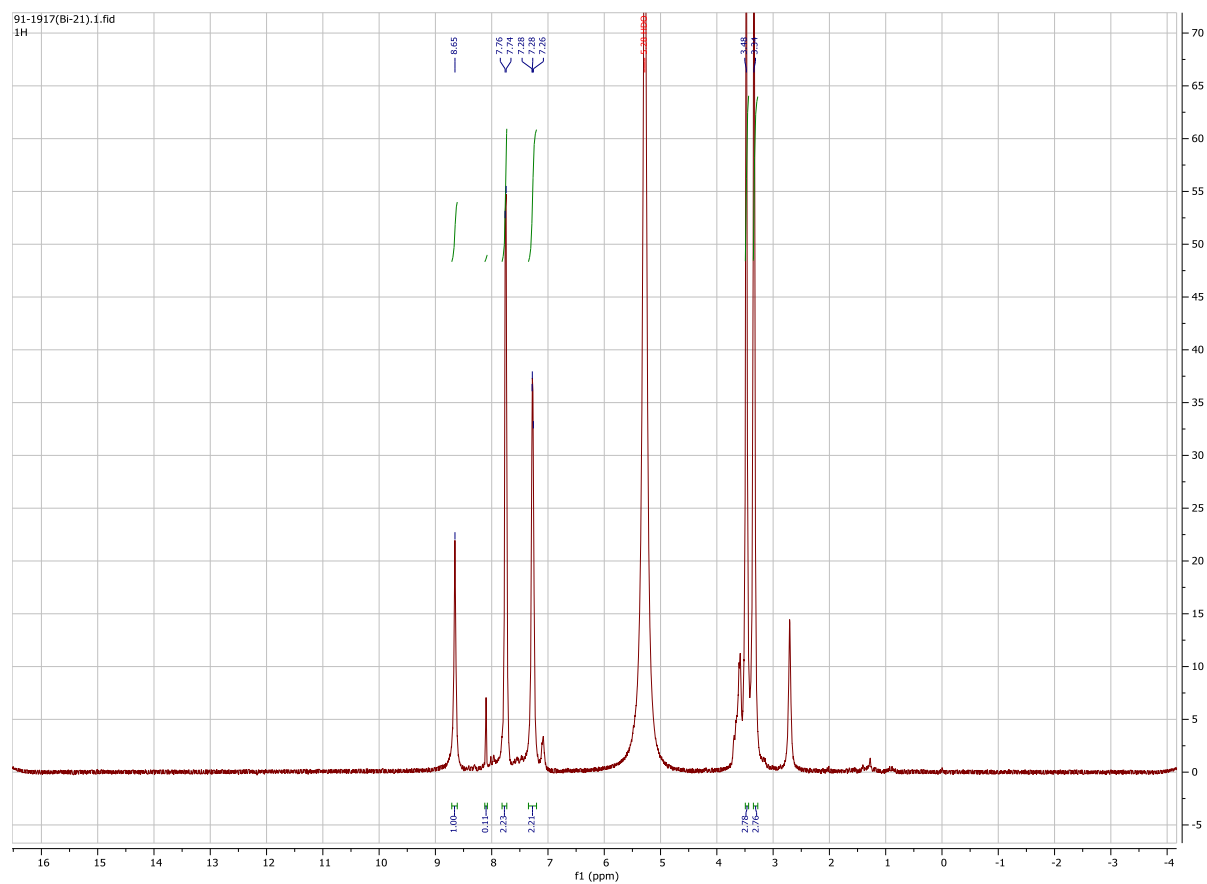

**Figure 18.**  $^{13}\text{C}$  NMR of N-(((4-iodophenyl)amino)methylene)-N-methylmethanaminium (**21**)

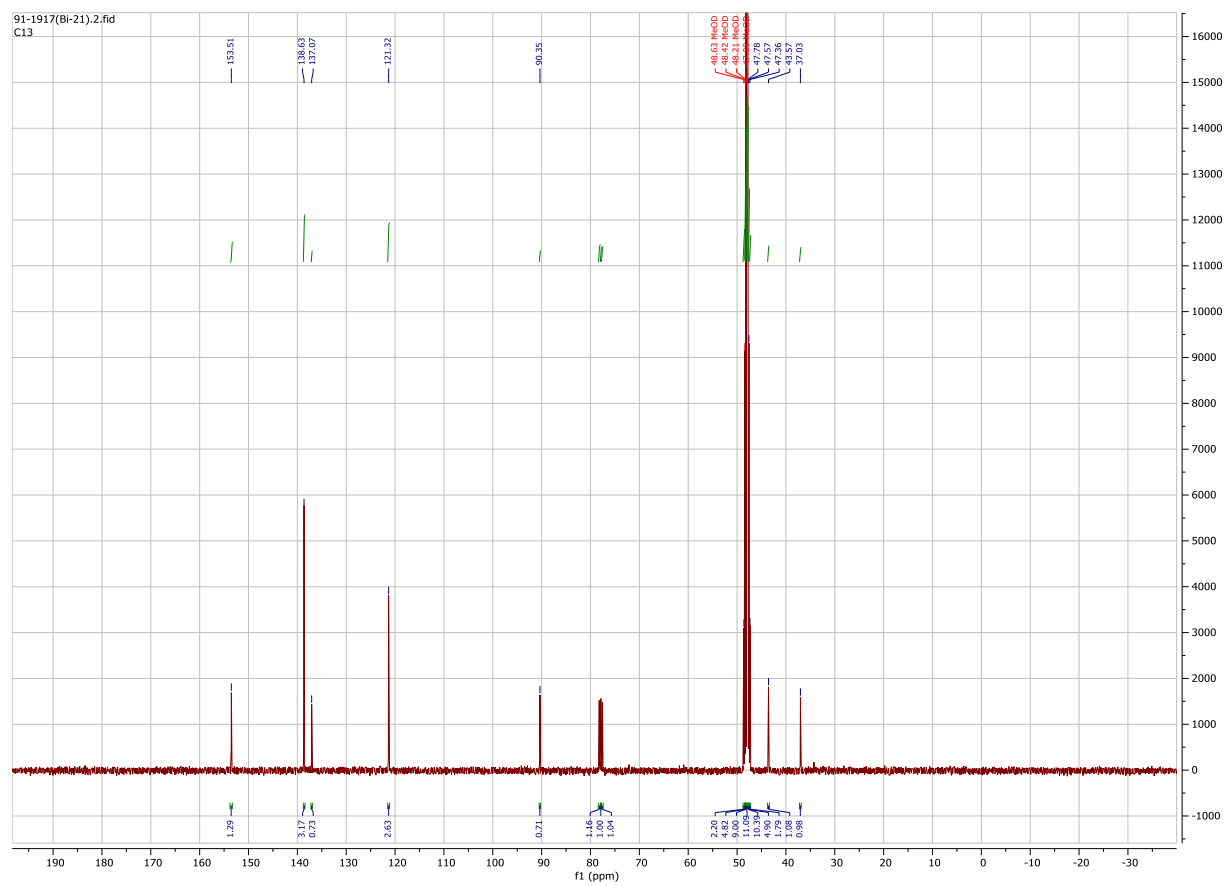

Supplement: f1 [file 9939506.f1.pdf]
